# Supplementary material for: Tyrosine Kinase 2 Inhibition With Zasocitinib (TAK-279) in Psoriasis: A Randomized Clinical Trial
Source: PubMed Central journal article supplement — JAMA Dermatol. 2024 Aug 21;160(10):1066–74. doi: 10.1001/jamadermatol.2024.2701 (PMC11339701; doi:10.1001/jamadermatol.2024.2701), 2024-08-21
Supplement: jamadermatol-e242701-s004.pdf [file jamadermatol-e242701-s004.pdf]

# Data Sharing Statement

Armstrong. Tyrosine Kinase 2 Inhibition With Zascotinib (TAK-279) in Psoriasis. *JAMA Dermatol*. Published August 21, 2024. doi:10.1001/jamadermatol.2024.2701

## Data

**Data available:** Yes

**Data types:** Other (please specify)

**Additional Information:** The data sets, including the redacted study protocol, redacted statistical analysis plan, and individual participant data supporting the results reported in this article, will be made available within 3 months from initial request to researchers who provide a methodologically sound proposal. The data will be provided after its de-identification, in compliance with applicable privacy laws, data protection, and requirements for consent and anonymization.

**How to access data:** The data sets, including the redacted study protocol, redacted statistical analysis plan, and individual participant data supporting the results reported in this article, will be made available within 3 months from initial request to researchers who provide a methodologically sound proposal. The data will be provided after its de-identification, in compliance with applicable privacy laws, data protection, and requirements for consent and anonymization.

**When available:** With publication

## Supporting Documents

**Document types:** None

## Additional Information

**Who can access the data:** The data sets, including the redacted study protocol, redacted statistical analysis plan, and individual participant data supporting the results reported in this article, will be made available within 3 months from initial request to researchers who provide a methodologically sound proposal.

**Types of analyses:** The data sets, including the redacted study protocol, redacted statistical analysis plan, and individual participant data supporting the results reported in this article, will be made available within 3 months from initial request to researchers who provide a methodologically sound proposal.

**Mechanisms of data availability:** The data will be provided after its de-identification, in compliance with applicable privacy laws, data protection, and requirements for consent and anonymization.
